# Supplementary material for: New Strigolactone Mimics as Exogenous Signals for Rhizosphere Organisms
Source: MDPI journal article supplement (doi:10.3390/molecules22060961), 2017-06-09
Supplement: s1 [file s1]

# Supplementary Material

## New strigolactone mimics as exogenous signals for rhizosphere organisms

### Supporting Information

#### The $^1\text{H}$ NMR and $^{13}\text{C}$ NMR spectra of compounds 3, 5 and 7.

Florin Oancea<sup>1</sup>, Emilian Georgescu<sup>2</sup>, Radoslava Matusova<sup>3</sup>, Florentina Georgescu<sup>4</sup>, Alina Nicolescu<sup>5,6</sup>, Iuliana Raut<sup>1</sup>, Maria-Luiza Jecu<sup>1</sup>, Marius-Constantin Vladulescu<sup>4</sup>, Lucian Vladulescu<sup>4</sup> and Calin Deleanu<sup>5,6,\*</sup>

<sup>1</sup> National Research & Development Institute for Chemistry & Petrochemistry – ICECHIM, Spl. Independentei 202, RO-060021 Bucharest, Romania; Florin.Oancea@icechim.ro; iulia\_rt@yahoo.com; Jecu.Luiza@icechim.ro

<sup>2</sup> Research Center Oltschim, St. Uzinei 1, RO-240050 Ramnicu Valcea, Romania; g\_emilian@yahoo.com

<sup>3</sup> Plant Science and Biodiversity Center SAS, Institute of Plant Genetics and Biotechnology, PO Box 39A, 95007 Nitra, Slovakia; Radka.Matusova@savba.sk

<sup>4</sup> Research Dept., Teso Spec S. R. L., Str. Muncii 53, RO-915200 Fundulea, Calarasi, Romania; florentina\_fg@yahoo.com; marius.vladulescu@tesospec.com; lucian.vladulescu@tesospec.com

<sup>5</sup> “C. D. Nenitescu” Centre of Organic Chemistry, Romanian Academy, Spl. Independentei 202B, Bucharest RO-060023, Romania; alina220382@yahoo.com; calin.deleanu@yahoo.com

<sup>6</sup> “Petru Poni” Institute of Macromolecular Chemistry, Romanian Academy, Aleea Grigore Ghica Voda 41-A, 700487 Iasi, Romania; alina220382@yahoo.com; calin.deleanu@yahoo.com

\* Correspondence: calin.deleanu@yahoo.com; Tel.: +40-744-340-456

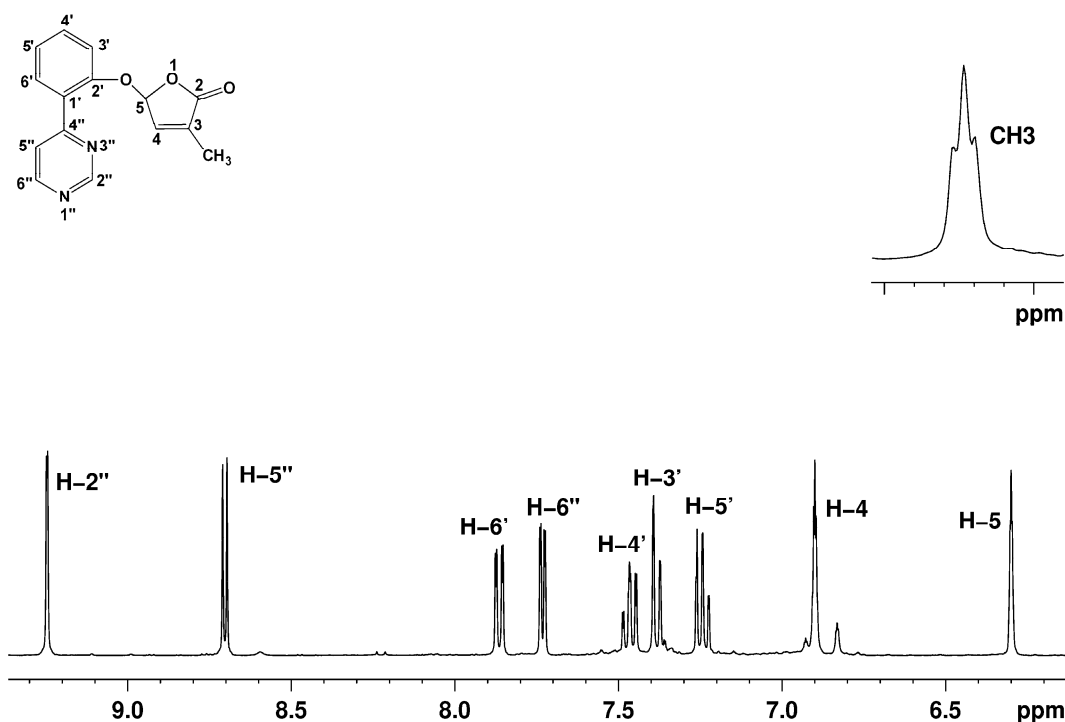

**Figure S1.** The <sup>1</sup>H NMR spectrum for compound **3**, recorded in CDCl<sub>3</sub>, showing the assignments of the protons. The signal corresponding to the methyl group is displayed in the insert.

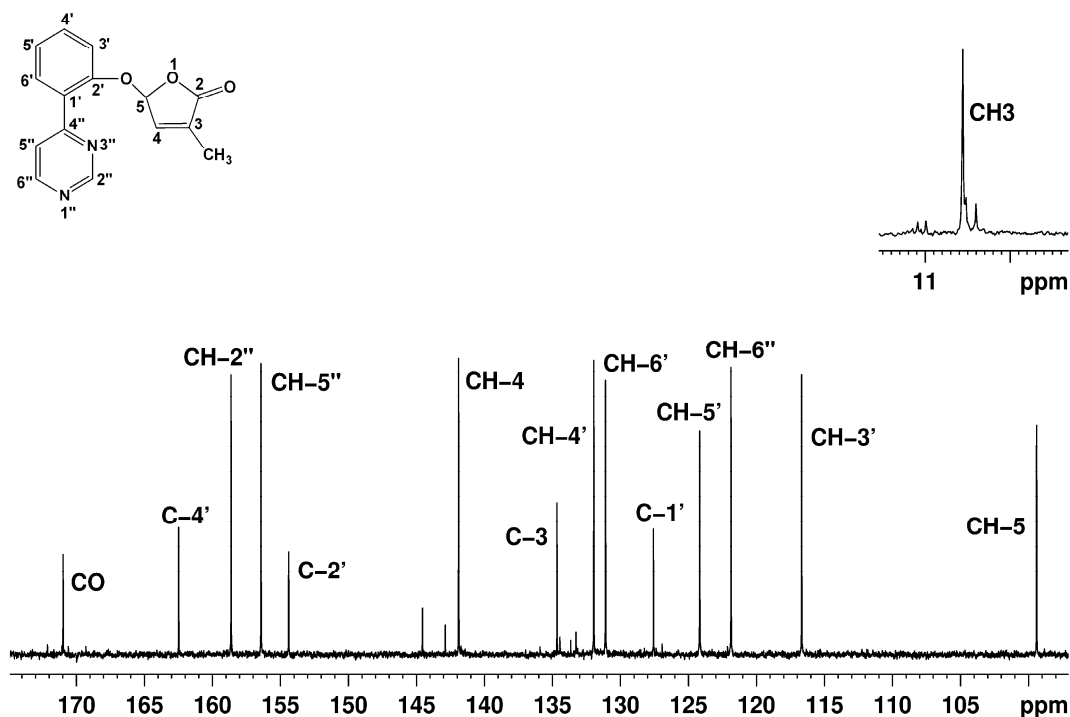

**Figure S2.** The <sup>13</sup>C NMR spectrum for compound **3**, recorded in CDCl<sub>3</sub>, showing the assignments of the carbons. The signal corresponding to the methyl group is displayed in the insert.

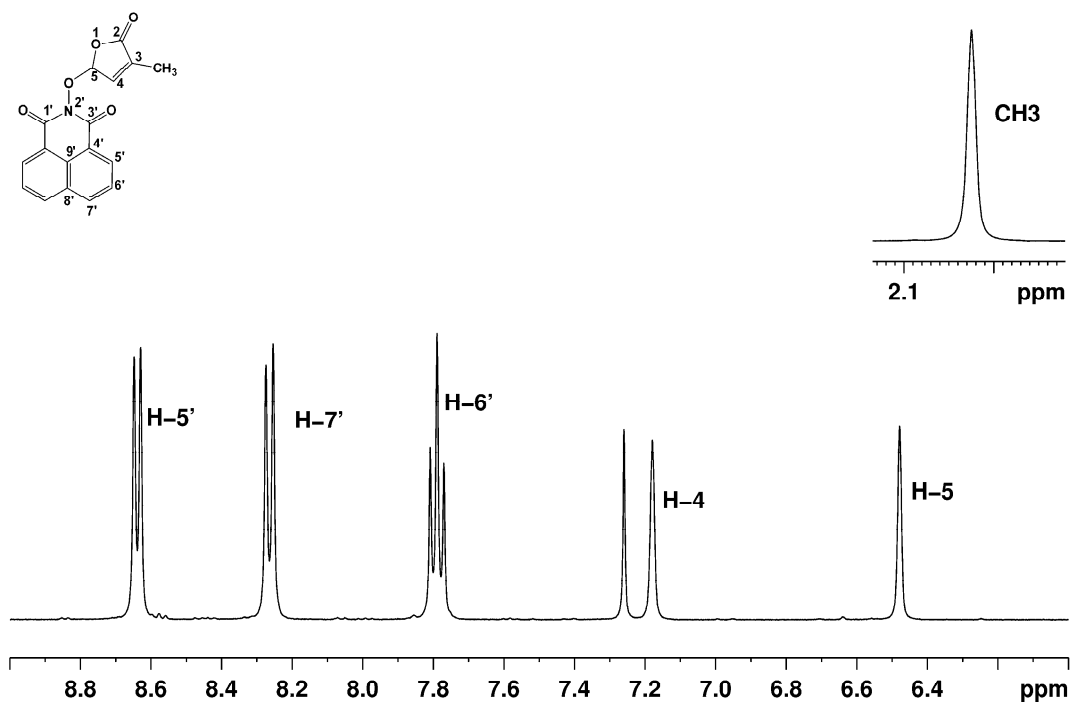

**Figure S3.** The  $^1\text{H}$  NMR spectrum for compound **5**, recorded in CDCl<sub>3</sub>, showing the assignments of the protons. The signal corresponding to the methyl group is displayed in the insert.

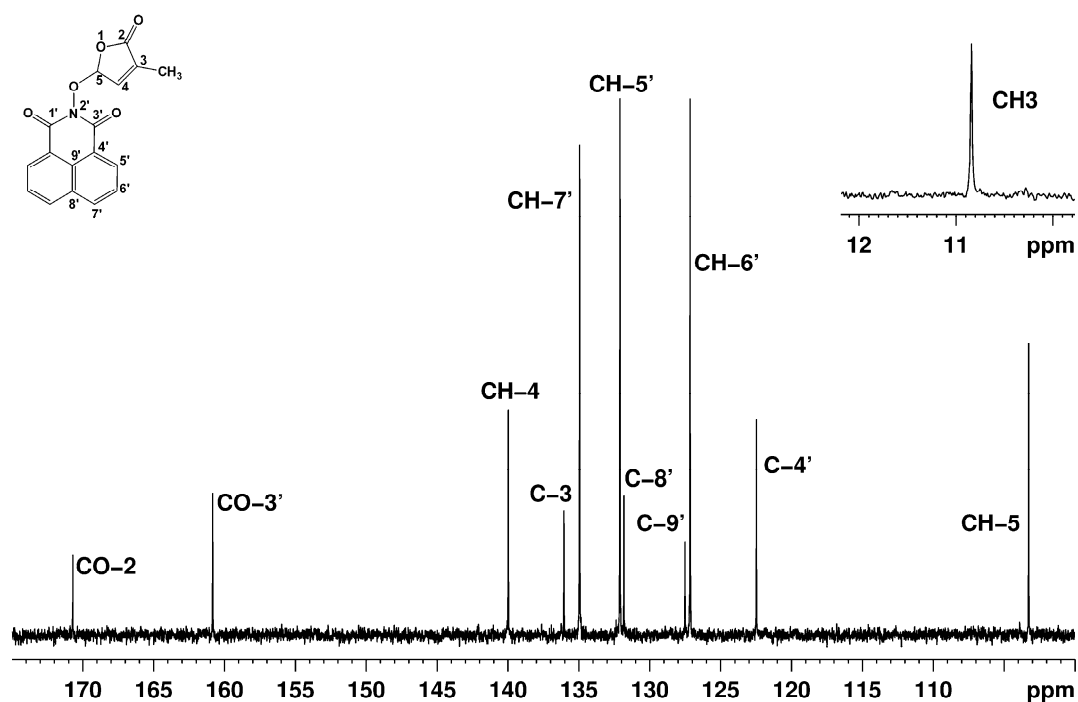

**Figure S4.** The  $^{13}\text{C}$  NMR spectrum for compound **5**, recorded in CDCl<sub>3</sub>, showing the assignments of the carbons. The signal corresponding to the methyl group is displayed in the insert.

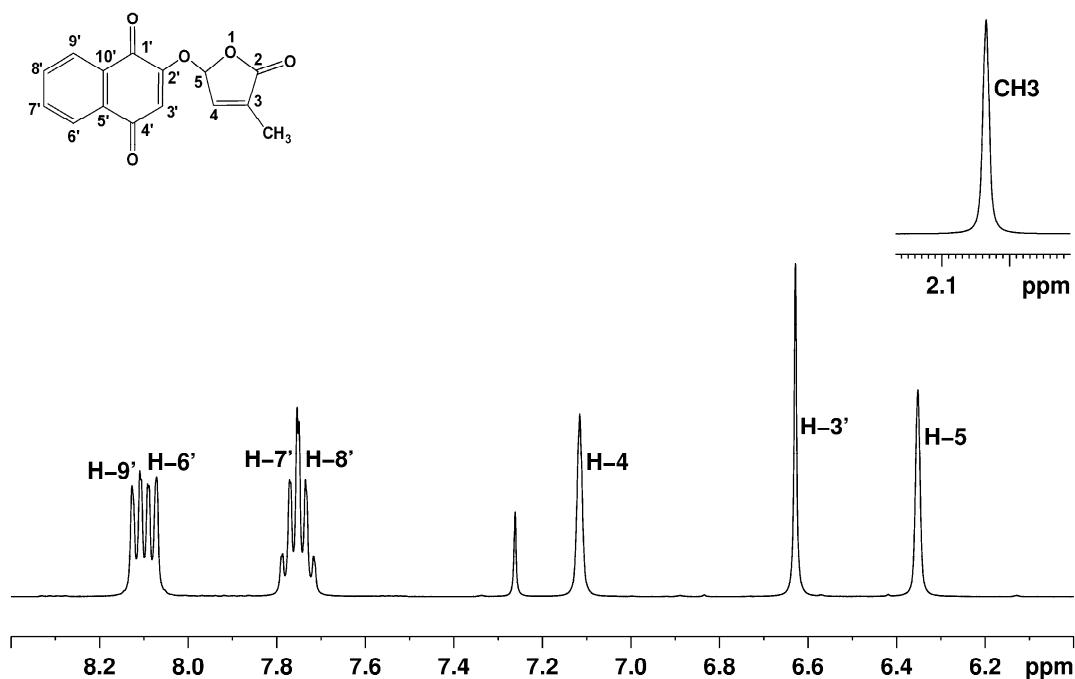

**Figure S5.** The <sup>1</sup>H NMR spectrum for compound 7, recorded in CDCl<sub>3</sub>, showing the assignments of the protons. The signal corresponding to the methyl group is displayed in the insert.

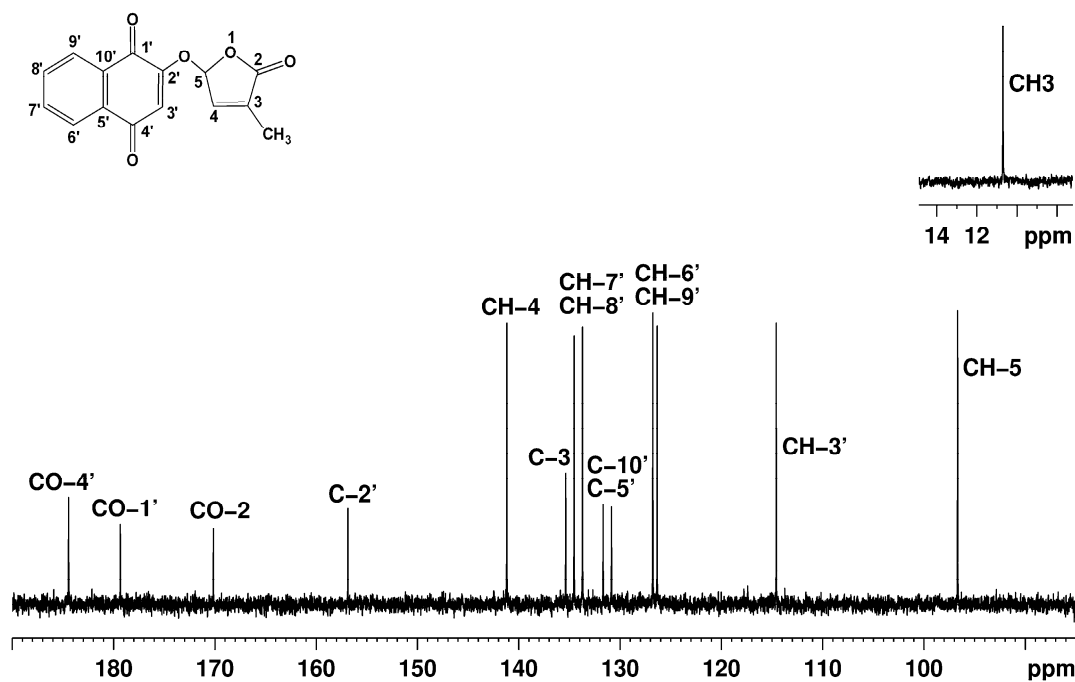

**Figure S6.** The <sup>13</sup>C NMR spectrum for compound 7, recorded in CDCl<sub>3</sub>, showing the assignments of the carbons. The signal corresponding to the methyl group is displayed in the insert.
